# Supplementary material for: Metabolic Syndrome at an Outpatient Clinic for Bipolar Disorders: A Case for Systematic Somatic Monitoring
Source: Atypon-hosted journal article supplement (doi:10.1176/appi.ps.201800121), 2018-12-10
Supplement: appi.ps.201800121.ds001.pdf [file appi.ps.201800121.ds001.pdf]

Data supplement for Simoons et al., Metabolic Syndrome at an Outpatient Clinic for Bipolar Disorders: A Case for Systematic Somatic Monitoring (doi: 10.1176/appi.ps.201800121)

**Presence of metabolic syndrome components according to the ATP III criteria (1) after introduction of MOPHAR (n=116)**

| Metabolic syndrome component (any 3 of 5 constitute diagnosis of metabolic syndrome) | Presence of metabolic syndrome components |           | Drug treatment for dyslipidemia, hypertension and/or hyperglycemia |                                     | Presence of metabolic syndrome components corrected for successful treatment |           |
|--------------------------------------------------------------------------------------|-------------------------------------------|-----------|--------------------------------------------------------------------|-------------------------------------|------------------------------------------------------------------------------|-----------|
|                                                                                      | n                                         | %         | n                                                                  | %                                   | n                                                                            | %         |
| Elevated waist circumference <sup>a</sup>                                            | 79                                        | 68        |                                                                    |                                     | 79                                                                           | 68        |
| Elevated triglycerides <sup>b</sup>                                                  | 51                                        | 44        | 19                                                                 | 16                                  | 49                                                                           | 42        |
| Reduced HDL-cholesterol <sup>c</sup>                                                 | 47                                        | 41        | see cell above, combined count                                     | see cell above, combined percentage | 45                                                                           | 39        |
| Elevated blood pressure <sup>d</sup>                                                 | 70                                        | 60        | 28                                                                 | 24                                  | 67                                                                           | 58        |
| Elevated fasting glucose <sup>e</sup>                                                | 49                                        | 42        | 10                                                                 | 9                                   | 49                                                                           | 42        |
| <b>Total for metabolic syndrome</b>                                                  | <b>62</b>                                 | <b>53</b> | <b>33</b>                                                          | <b>28<sup>f</sup></b>               | <b>59</b>                                                                    | <b>51</b> |

<sup>a</sup> ≥102 cm in men, ≥88 cm in women

<sup>b</sup> ≥1.7 mmol/L or on drug treatment for elevated triglycerides

<sup>c</sup> <1.03 mmol/L in men, <1.3 mmol/L in women or on drug treatment for reduced HDL-cholesterol

<sup>d</sup> ≥130 mm Hg systolic blood pressure or ≥85 mm Hg diastolic blood pressure or on antihypertensive drug treatment

<sup>e</sup> ≥5.6 mmol/L or on drug treatment for elevated glucose

<sup>f</sup> The 33 patients treated for dyslipidemia, hypertension and/or hyperglycemia make up 53% of the 62 patients with a diagnosis of metabolic syndrome.

ATP-III, (National Cholesterol Education Program) Adult Treatment Protocol III; HDL, high density lipoprotein;

References

1. Grundy SM, Cleeman JI, Daniels SR, et al: Diagnosis and management of the metabolic syndrome: an American Heart Association/National Heart, Lung, and Blood Institute Scientific Statement. *Circulation* 112:2735-2752, 2005

### Characteristics of the study population (n=155)

| Characteristic                                                                                                                | Value    |       |
|-------------------------------------------------------------------------------------------------------------------------------|----------|-------|
| Female, n (%)                                                                                                                 | 88       | 57%   |
| Age, mean±standard deviation, years                                                                                           | 50.1±9.7 |       |
| Primary diagnosis, n (%)                                                                                                      |          |       |
| Bipolar I disorder                                                                                                            | 79       | 51%   |
| Bipolar II disorder                                                                                                           | 42       | 27%   |
| Cyclothymic disorder                                                                                                          | 2        | 1%    |
| Unspecified bipolar or related disorder                                                                                       | 1        | 1%    |
| Other primary (non-bipolar) disorder                                                                                          | 31       | 20%   |
| Duration of disease, n (%)                                                                                                    |          |       |
| 0-5 years                                                                                                                     | 11       | 7%    |
| 5-10 years                                                                                                                    | 46       | 30%   |
| >10 years                                                                                                                     | 98       | 63%   |
| Duration of outpatient treatment since first appointment with current main treatment officer, mean±standard deviation, months | 10.0±4.7 |       |
| Outcome Questionnaire-45 (OQ45) score (n=137), median (range)                                                                 | 46       | 8-117 |
| Physical complaints and general functioning: >55 indicates symptoms of clinical significance                                  |          |       |
| DSM-5 Self-Rated Level 1 Cross-Cutting Symptom Measure—Adult (n=145)                                                          |          |       |
| Score above threshold for depression                                                                                          | 65       | 45%   |
| Score above threshold for mania                                                                                               | 35       | 24%   |
| Score above threshold for >2 domains                                                                                          | 80       | 55%   |
| Patients without monitoring measurements at first appointment, n (%)                                                          | 67       | 43%   |
| Number of psychotropic drug used, n (%)                                                                                       |          |       |
| 0                                                                                                                             | 6        | 4%    |
| 1                                                                                                                             | 44       | 28%   |
| 2                                                                                                                             | 57       | 37%   |
| 3                                                                                                                             | 26       | 17%   |
| 4                                                                                                                             | 22       | 14%   |
| Psychotropic drugs used, n (%)                                                                                                |          |       |
| Amitriptyline                                                                                                                 | 1        | 1%    |
| Aripiprazol                                                                                                                   | 2        | 1%    |
| Benzodiazepine                                                                                                                | 65       | 42%   |
| Carbamazepine                                                                                                                 | 3        | 2%    |
| Clomipramine                                                                                                                  | 3        | 2%    |
| Clozapine                                                                                                                     | 3        | 2%    |
| Haloperidol                                                                                                                   | 1        | 1%    |
| Imipramine                                                                                                                    | 1        | 1%    |
| Lamotrigine                                                                                                                   | 20       | 13%   |
| Lithium                                                                                                                       | 85       | 55%   |
| Lurasidon                                                                                                                     | 1        | 1%    |
| Mirtazapine                                                                                                                   | 1        | 1%    |
| Nortriptyline                                                                                                                 | 5        | 3%    |
| Olanzapine                                                                                                                    | 34       | 22%   |
| Quetiapine                                                                                                                    | 25       | 16%   |
| Risperidone/paliperidone                                                                                                      | 7        | 5%    |
| Selective serotonin reuptake inhibitors (SSRIs)                                                                               | 23       | 15%   |
| Valproic acid                                                                                                                 | 19       | 12%   |
| Venlafaxine                                                                                                                   | 9        | 6%    |
| Other                                                                                                                         | 16       | 10%   |

DSM Diagnostic and Statistical Manual of Mental Disorders

**Performance of monitoring measurements before (at first appointment) and after introduction of the MOPHAR general somatic screening (n=155)**

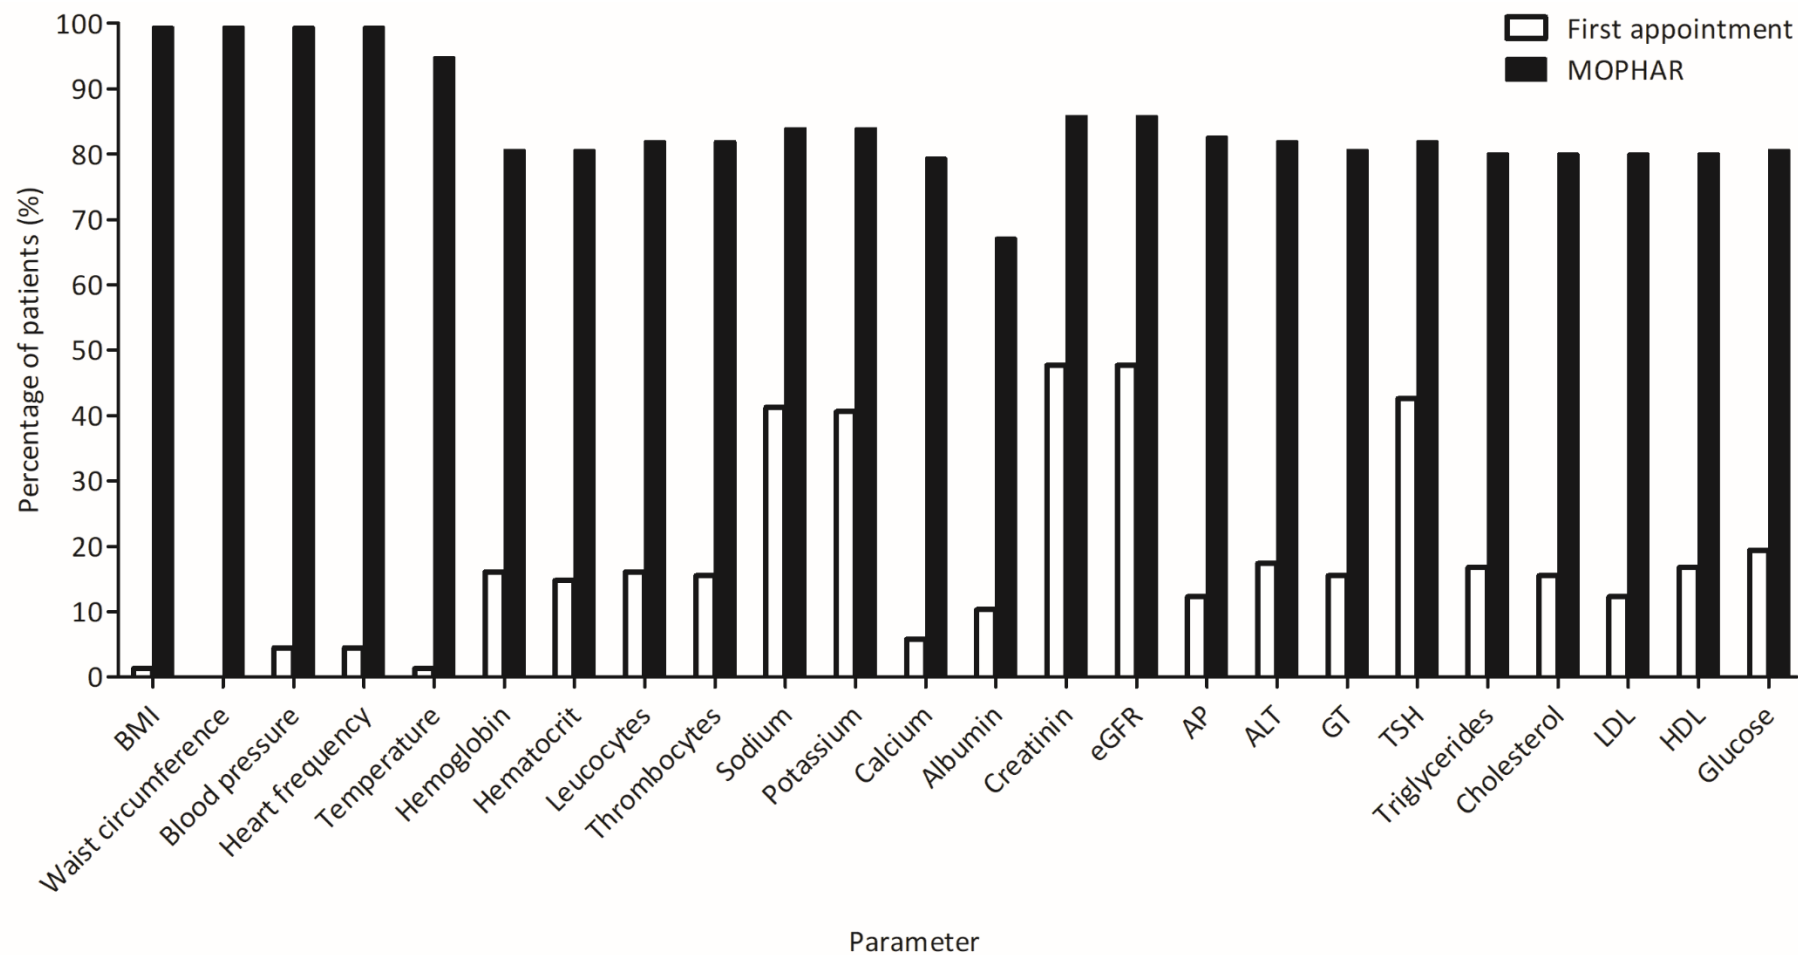

BMI Body Mass Index, eGFR estimated Glomerular Filtration Rate, AP Alkaline Phosphatase, ALT Alanine Transaminase, GT Gamma-glutamyltransferase, TSH Thyroid-stimulating Hormone, LDL Low-density Lipoprotein, HDL High-density Lipoprotein.
